# Supplementary material for: Choline chloride-based deep eutectic solvents for efficient cycloaddition of CO2 with propylene oxide
Source: Royal Society of Chemistry journal article supplement (doi:10.1039/c8cc04412k), 2018-01-01
Supplement: c8cc04412k1.pdf [file c8cc04412k1.pdf]

## Supporting information

### Choline chloride-based deep eutectic solvents for efficient cycloaddition of CO<sub>2</sub> with propylene oxide

Kai Wu, Ting Su, Dongmei Hao, Weiping Liao, Yuchao Zhao, Wanzhong Ren, Changliang Deng, Hongying Lü\*

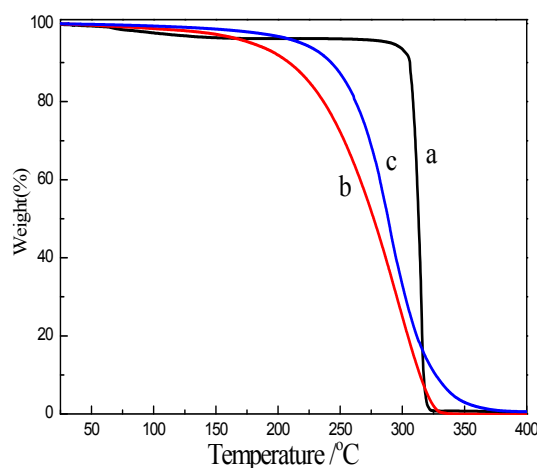

Fig. S1 TGA curves of CHCl (a), PEG<sub>200</sub> (b) and CHCl/PEG<sub>200</sub> (c).

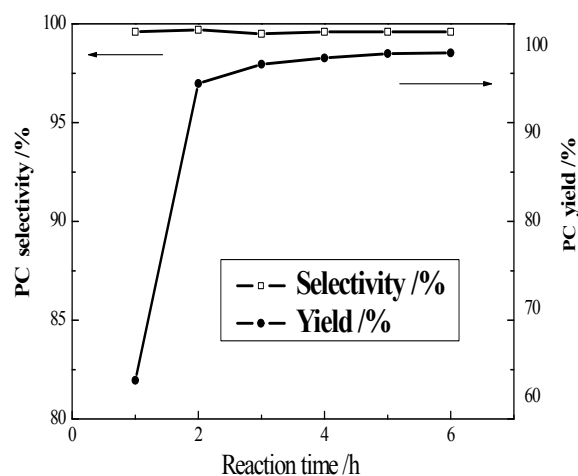

Fig. S2 Effect of reaction time on PC yield and selectivity.

Reaction conditions: PO 71.5 mmol, catalyst 1.5 mmol, reaction temperature 150 °C, CO<sub>2</sub> pressure 0.8 MPa

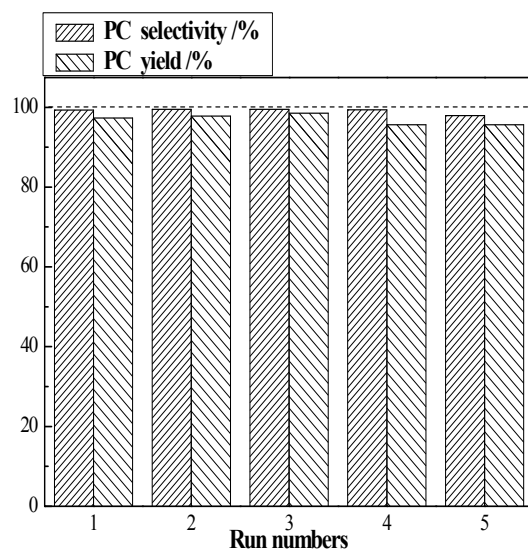

**Fig. S3** Recycle of catalyst for cycloaddition reaction.

Reaction conditions: PO 71.5 mmol, catalyst 1.5 mmol, reaction temperature 150 °C, CO<sub>2</sub> pressure 0.8 MPa, 5 h
